# Supplementary material for: Fine‐scale barriers to connectivity across a fragmented South‐East Asian landscape in six songbird species
Source: PubMed Central journal article supplement (PMC7232758; doi:10.1111/eva.12918), 2020-03-05
Supplement: EVA-13-1026-s001.pdf [file EVA-13-1026-s001.pdf]

## Supporting Information

**Table S1.** Singapore samples of *Pellorneum malaccense*, *Cyanoderma erythropterum*, *Turdinus abbotti*, *Mixornis gularis*, *Pycnonotus plumosus*, and *Pycnonotus simplex* used in this study.

| Species                           | Sample ID <sup>a</sup> | Date <sup>b</sup> | Sampling locality       | Latitude | Longitude  | Source <sup>c</sup> | GenBank sample name |
|-----------------------------------|------------------------|-------------------|-------------------------|----------|------------|---------------------|---------------------|
| <i>P. malaccense</i>              | L2317                  | 19/5/2015         | North Central Catchment | 1.381017 | 103.814667 | this study          | NUS-L2317           |
| <i>P. malaccense</i> <sup>d</sup> | L2318                  | 19/5/2015         | North Central Catchment | 1.381017 | 103.814667 | this study          | NUS-L2318           |
| <i>P. malaccense</i>              | L1530                  | 8/10/2013         | North Central Catchment | 1.380551 | 103.810555 | this study          | NUS-L1530           |
| <i>P. malaccense</i>              | L1531                  | 7/10/2013         | North Central Catchment | 1.380551 | 103.810555 | this study          | NUS-L1531           |
| <i>P. malaccense</i>              | L1569                  | 4/6/2013          | North Central Catchment | -        | -          | this study          | NUS-L1569           |
| <i>P. malaccense</i>              | L1801                  | 7/10/2013         | North Central Catchment | 1.380551 | 103.810555 | this study          | NUS-L1801           |
| <i>P. malaccense</i> <sup>d</sup> | L1813                  | 3/1/2014          | North Central Catchment | 1.383779 | 103.800888 | this study          | NUS-L1813           |
| <i>P. malaccense</i>              | L1814                  | 3/1/2014          | North Central Catchment | 1.383779 | 103.800888 | this study          | NUS-L1814           |
| <i>P. malaccense</i>              | L1815                  | 3/1/2014          | North Central Catchment | 1.383779 | 103.800888 | this study          | NUS-L1815           |
| <i>P. malaccense</i> <sup>d</sup> | L1810                  | 13/11/2013        | North Central Catchment | 1.377849 | 103.809926 | this study          | NUS-L1810           |
| <i>P. malaccense</i>              | L1809                  | 5/11/2013         | North Central Catchment | 1.396403 | 103.803543 | this study          | NUS-L1809           |

|                                   |            |            |                         |          |            |            |                |
|-----------------------------------|------------|------------|-------------------------|----------|------------|------------|----------------|
| <i>P. malaccense</i>              | L1578      | 2/10/2013  | North Central Catchment | 1.396403 | 103.803543 | this study | NUS-L1578      |
| <i>P. malaccense</i> <sup>d</sup> | L1807      | 5/11/2013  | North Central Catchment | 1.396403 | 103.803543 | this study | NUS-L1807      |
| <i>P. malaccense</i> <sup>d</sup> | L2345      | 3/11/2015  | North Central Catchment | 1.398802 | 103.807574 | this study | NUS-L2345      |
| <i>P. malaccense</i> <sup>e</sup> | UWBM 81953 | 9/8/1998   | North Central Catchment |          |            | BMNHC      | NUS-UWBM 81953 |
| <i>P. malaccense</i> <sup>e</sup> | UWBM 81952 | 9/8/1998   | North Central Catchment |          |            | BMNHC      | NUS-UWBM 81952 |
| <i>P. malaccense</i>              | L1565      | 20/4/2013  | South Central Catchment | 1.357036 | 103.812693 | this study | NUS-L1565      |
| <i>P. malaccense</i>              | L1566      | 11/5/2013  | South Central Catchment | 1.357036 | 103.812693 | this study | NUS-L1566      |
| <i>P. malaccense</i>              | UWBM 81955 | 13/8/1998  | South Central Catchment |          |            | BMNHC      | NUS-UWBM 81955 |
| <i>P. malaccense</i>              | UWBM 81957 | 14/8/1998  | South Central Catchment |          |            | BMNHC      | NUS-UWBM 81957 |
| <i>P. malaccense</i> <sup>e</sup> | UWBM 81956 | 14/8/1998  | South Central Catchment |          |            | BMNHC      | NUS-UWBM 81956 |
| <i>P. malaccense</i>              | L1562      | 11/5/2013  | South Central Catchment | 1.357036 | 103.812693 | this study | NUS-L1562      |
| <i>P. malaccense</i>              | L1838      | 26/3/2015  | South Central Catchment | 1.3552   | 103.813117 | this study | NUS-L1838      |
| <i>P. malaccense</i>              | L1839      | 26/3/2015  | South Central Catchment | 1.3552   | 103.813117 | this study | NUS-L1839      |
| <i>P. malaccense</i> <sup>d</sup> | L1902      | 27/3/2015  | South Central Catchment | 1.359581 | 103.812837 | this study | NUS-L1902      |
| <i>P. malaccense</i>              | L1808      | 5/11/2013  | North Central Catchment | 1.396403 | 103.803543 | this study | NUS-L1808      |
| <i>P. malaccense</i>              | L1811      | 31/12/2013 | South Central Catchment | 1.351502 | 103.806386 | this study | NUS-L1811      |

|                                   |       |            |                         |          |            |            |           |
|-----------------------------------|-------|------------|-------------------------|----------|------------|------------|-----------|
| <i>P. malaccense</i> <sup>d</sup> | L1812 | 31/12/2013 | South Central Catchment | 1.351502 | 103.806386 | this study | NUS-L1812 |
| <i>P. malaccense</i>              | L1816 | 7/1/2013   | South Central Catchment | 1.35595  | 103.801723 | this study | NUS-L1816 |
| <i>P. malaccense</i>              | L1820 | 17/10/2013 | South Central Catchment | 1.355264 | 103.798923 | this study | NUS-L1820 |
| <i>P. malaccense</i>              | L1821 | 8/1/2014   | South Central Catchment | 1.35595  | 103.801723 | this study | NUS-L1821 |
| <i>P. malaccense</i>              | L1823 | 10/12/2014 | South Central Catchment | 1.35685  | 103.803733 | this study | NUS-L1823 |
| <i>P. malaccense</i>              | L1824 | 10/12/2014 | South Central Catchment | 1.35615  | 103.803839 | this study | NUS-L1824 |
| <i>P. malaccense</i>              | L1802 | 17/10/2013 | South Central Catchment | 1.355264 | 103.798923 | this study | NUS-L1802 |
| <i>P. malaccense</i> <sup>d</sup> | L1803 | 18/10/2013 | South Central Catchment | 1.355264 | 103.798923 | this study | NUS-L1803 |
| <i>P. malaccense</i>              | L1827 | 3/3/2015   | South Central Catchment | 1.350917 | 103.829833 | this study | NUS-L1827 |
| <i>P. malaccense</i>              | L1832 | 4/3/2015   | South Central Catchment | 1.35295  | 103.8265   | this study | NUS-L1832 |
| <i>P. malaccense</i>              | L1833 | 5/3/2015   | South Central Catchment | 1.351767 | 103.83055  | this study | NUS-L1833 |
| <i>P. malaccense</i>              | L1834 | 5/3/2015   | South Central Catchment | 1.351767 | 103.83055  | this study | NUS-L1834 |
| <i>P. malaccense</i>              | L1836 | 5/3/2015   | South Central Catchment | 1.35225  | 103.828233 | this study | NUS-L1836 |
| <i>P. malaccense</i>              | K0307 | 28/5/2015  | South Central Catchment | 1.352417 | 103.828617 | this study | NUS-K0307 |
| <i>P. malaccense</i>              | L2321 | 28/5/2015  | South Central Catchment | 1.352417 | 103.828617 | this study | NUS-L2321 |
| <i>P. malaccense</i> <sup>d</sup> | L2325 | 29/5/2015  | South Central Catchment | 1.352583 | 103.827767 | this study | NUS-L2325 |

|                                      |             |            |                         |          |            |            |                 |
|--------------------------------------|-------------|------------|-------------------------|----------|------------|------------|-----------------|
| <i>P. malaccense</i>                 | L1906       | 21/6/2014  | South Central Catchment | 1.348769 | 103.813112 | this study | NUS-L1906       |
| <i>P. malaccense</i> <sup>d</sup>    | L1905       | 20/6/2014  | South Central Catchment | 1.348769 | 103.813112 | this study | NUS-L1905       |
| <i>P. malaccense</i>                 | M1132       | 19/8/2015  | South Central Catchment | 1.348607 | 103.803114 | this study | NUS-M1132       |
| <i>P. malaccense</i> <sup>d</sup>    | L2326       | 18/8/2015  | South Central Catchment | 1.348607 | 103.803114 | this study | NUS-L2326       |
| <i>P. malaccense</i>                 | L1804       | 29/10/2013 | South Central Catchment | 1.353592 | 103.808224 | this study | NUS-L1804       |
| <i>P. malaccense</i>                 | L1806       | 30/10/2013 | South Central Catchment | 1.353592 | 103.808224 | this study | NUS-L1806       |
| <i>P. malaccense</i> <sup>d</sup>    | L1805       | 30/10/2013 | South Central Catchment | 1.353592 | 103.808224 | this study | NUS-L1805       |
| <i>P. malaccense</i>                 | L2327       | 25/8/2015  | South Central Catchment | 1.35829  | 103.823675 | this study | NUS-L2327       |
| <i>P. malaccense</i> <sup>d</sup>    | L1599       | 30/5/2014  | South Central Catchment | 1.356056 | 103.785652 | this study | NUS-L1599       |
| <i>P. malaccense</i> <sup>d</sup>    | L1901       | 30/5/2014  | South Central Catchment | 1.356056 | 103.785652 | this study | NUS-L1901       |
| <i>C. erythropterum</i>              | UWBM 117058 | na         | North Central Catchment | 1.381017 | 103.814667 | BMNHC      | NUS-UWBM 117058 |
| <i>C. erythropterum</i>              | J3742       | 19/5/2015  | North Central Catchment | 1.381017 | 103.814667 | this study | NUS-J3742       |
| <i>C. erythropterum</i>              | J3743       | 19/5/2015  | North Central Catchment | 1.381017 | 103.814667 | this study | NUS-J3743       |
| <i>C. erythropterum</i> <sup>d</sup> | J3744       | 19/5/2015  | North Central Catchment | 1.381017 | 103.814667 | this study | NUS-J3744       |
| <i>C. erythropterum</i>              | K0642       | 22/5/2013  | North Central Catchment | 1.37744  | 103.807826 | this study | NUS-K0642       |
| <i>C. erythropterum</i> <sup>d</sup> | K0643       | 22/5/2013  | North Central Catchment | 1.37744  | 103.807826 | this study | NUS-K0643       |

|                                      |        |            |                         |          |            |            |            |
|--------------------------------------|--------|------------|-------------------------|----------|------------|------------|------------|
| <i>C. erythropterum</i>              | J63813 | 3/11/2015  | North Central Catchment | 1.397722 | 103.806375 | this study | NUS-J63813 |
| <i>C. erythropterum</i> <sup>d</sup> | J3817  | 24/11/2015 | North Central Catchment | 1.396329 | 103.802033 | this study | NUS-J3817  |
| <i>C. erythropterum</i>              | J3736  | 26/3/2015  | South Central Catchment | 1.35924  | 103.812161 | this study | NUS-J3736  |
| <i>C. erythropterum</i>              | J3737  | 26/3/2015  | South Central Catchment | 1.355    | 103.813017 | this study | NUS-J3737  |
| <i>C. erythropterum</i>              | J3738  | 26/3/2015  | South Central Catchment | 1.355    | 103.813017 | this study | NUS-J3738  |
| <i>C. erythropterum</i>              | K0625  | 11/5/2013  | South Central Catchment | 1.357036 | 103.812693 | this study | NUS-K0625  |
| <i>C. erythropterum</i>              | J3734  | 26/3/2015  | South Central Catchment | 1.35924  | 103.812161 | this study | NUS-J3734  |
| <i>C. erythropterum</i>              | J3735  | 26/3/2015  | South Central Catchment | 1.35924  | 103.812161 | this study | NUS-J3735  |
| <i>C. erythropterum</i> <sup>d</sup> | K0668  | 20/9/2013  | South Central Catchment | 1.357036 | 103.812693 | this study | NUS-K0668  |
| <i>C. erythropterum</i>              | K1101  | 18/10/2013 | South Central Catchment | 1.355629 | 103.800891 | this study | NUS-K1101  |
| <i>C. erythropterum</i>              | K1108  | 7/1/2014   | South Central Catchment | 1.355629 | 103.800891 | this study | NUS-K1108  |
| <i>C. erythropterum</i>              | K1121  | 10/12/2014 | South Central Catchment | 1.355483 | 103.804517 | this study | NUS-K1121  |
| <i>C. erythropterum</i>              | K1123  | 10/12/2014 | South Central Catchment | 1.35685  | 103.803733 | this study | NUS-K1123  |
| <i>C. erythropterum</i> <sup>d</sup> | K1124  | 11/12/2014 | South Central Catchment | 1.355367 | 103.8042   | this study | NUS-K1124  |
| <i>C. erythropterum</i>              | K0690  | 21/6/2014  | South Central Catchment | 1.348769 | 103.813112 | this study | NUS-K0690  |
| <i>C. erythropterum</i>              | D3315  | 3/3/2015   | South Central Catchment | 1.35295  | 103.8265   | this study | NUS-D3315  |

|                                      |        |            |                         |          |            |            |            |
|--------------------------------------|--------|------------|-------------------------|----------|------------|------------|------------|
| <i>C. erythropterum</i>              | J3725  | 3/3/2015   | South Central Catchment | 1.35295  | 103.8265   | this study | NUS-J3725  |
| <i>C. erythropterum</i>              | J3724  | 3/3/2015   | South Central Catchment | 1.350917 | 103.829833 | this study | NUS-J3724  |
| <i>C. erythropterum</i> <sup>d</sup> | J3728  | 3/3/2015   | South Central Catchment | 1.350917 | 103.829833 | this study | NUS-J3728  |
| <i>T. abbotti</i>                    | L2308  | 7/4/2015   | South Central Catchment | 1.33815  | 103.817683 | this study | NUS-L2308  |
| <i>T. abbotti</i>                    | L2309  | 7/4/2015   | South Central Catchment | 1.33815  | 103.817683 | this study | NUS-L2309  |
| <i>T. abbotti</i>                    | L2314  | 9/4/2015   | South Central Catchment | 1.34085  | 103.820783 | this study | NUS-L2314  |
| <i>T. abbotti</i>                    | L2312  | 9/4/2015   | South Central Catchment | 1.34085  | 103.820783 | this study | NUS-L2312  |
| <i>T. abbotti</i>                    | L2315  | 9/4/2015   | South Central Catchment | 1.34085  | 103.820783 | this study | NUS-L2315  |
| <i>T. abbotti</i>                    | L2316  | 9/4/2015   | South Central Catchment | 1.34085  | 103.820783 | this study | NUS-L2316  |
| <i>T. abbotti</i>                    | L2313  | 9/4/2015   | South Central Catchment | 1.343267 | 103.821467 | this study | NUS-L2313  |
| <i>T. abbotti</i>                    | L1837  | 5/3/2015   | South Central Catchment | 1.35295  | 103.8265   | this study | NUS-L1837  |
| <i>T. abbotti</i>                    | L2322  | 28/5/2015  | South Central Catchment | 1.353433 | 103.8269   | this study | NUS-L2322  |
| <i>T. abbotti</i>                    | L2324  | 28/5/2015  | South Central Catchment | 1.353433 | 103.8269   | this study | NUS-L2324  |
| <i>T. abbotti</i>                    | L2323  | 28/5/2015  | South Central Catchment | 1.353433 | 103.8269   | this study | NUS-L2323  |
| <i>T. abbotti</i>                    | FL1826 | 17/12/2014 | Sentosa Island          | 1.257096 | 103.813284 | this study | NUS-FL1826 |
| <i>T. abbotti</i>                    | L1738  | 21/8/2014  | Ubin Island             | 1.412226 | 103.966195 | this study | NUS-L1738  |

|                                |             |            |                         |          |            |                 |                 |
|--------------------------------|-------------|------------|-------------------------|----------|------------|-----------------|-----------------|
| <i>T. abbotti</i>              | L1718       | 22/8/2013  | Ubin Island             | 1.412226 | 103.966195 | this study      | NUS-L1718       |
| <i>T. abbotti</i>              | L1719       | 22/8/2013  | Ubin Island             | 1.412226 | 103.966195 | this study      | NUS-L1719       |
| <i>T. abbotti</i>              | M1466       | 20/8/2015  | Ubin Island             | 1.419749 | 103.931458 | this study      | NUS-M1466       |
| <i>T. abbotti</i>              | M1460       | 25/6/2015  | Ubin Island             | 1.419749 | 103.931458 | this study      | NUS-M1460       |
| <i>T. abbotti</i>              | FL1743      | 30/4/2015  | Ubin Island             | 1.419749 | 103.931458 | this study      | NUS-FL1743      |
| <i>M. gularis</i>              | K1103       | 12/12/2013 | Admiralty Park          | 1.449878 | 103.778439 | Tan et al. 2018 | NUS-K1103       |
| <i>M. gularis</i>              | K1104       | 12/12/2013 | Admiralty Park          | 1.449878 | 103.778439 | this study      | NUS-K1104       |
| <i>M. gularis</i> <sup>d</sup> | K1105       | 12/12/2013 | Admiralty Park          | 1.449878 | 103.778439 | this study      | NUS-K1105       |
| <i>M. gularis</i>              | UWBM 117353 | 3/1/2007   | North Central Catchment | 1.345831 | 103.831843 | BMNHC           | NUS-UWBM 117353 |
| <i>M. gularis</i>              | J3137       | 7/3/2014   | North Central Catchment | 1.359081 | 103.782795 | Tan et al. 2018 | NUS-J3137       |
| <i>M. gularis</i> <sup>d</sup> | K0679       | 7/3/2014   | North Central Catchment | 1.359081 | 103.782795 | this study      | NUS-K0679       |
| <i>M. gularis</i>              | J2843       | 7/3/2014   | North Central Catchment | 1.359081 | 103.782795 | Tan et al. 2018 | NUS-J2843       |
| <i>M. gularis</i>              | K0676       | 8/3/2014   | North Central Catchment | 1.359081 | 103.782795 | Tan et al. 2018 | NUS-K0676       |
| <i>M. gularis</i>              | K1111       | 10/1/2014  | North Central Catchment | 1.396495 | 103.803347 | this study      | NUS-K1111       |
| <i>M. gularis</i> <sup>d</sup> | K0659       | 10/7/2013  | North Central Catchment | 1.398979 | 103.807907 | this study      | NUS-K0659       |
| <i>M. gularis</i>              | K0657       | 9/7/2013   | North Central Catchment | 1.398979 | 103.807907 | this study      | NUS-K0657       |

|                                |       |            |                         |          |            |                 |           |
|--------------------------------|-------|------------|-------------------------|----------|------------|-----------------|-----------|
| <i>M. gularis</i>              | L1548 | 21/5/2013  | North Central Catchment | 1.37744  | 103.807826 | Tan et al. 2018 | NUS-L1548 |
| <i>M. gularis</i>              | K0640 | 21/5/2013  | North Central Catchment | 1.37744  | 103.807826 | Tan et al. 2018 | NUS-K0640 |
| <i>M. gularis</i>              | K0636 | 21/5/2013  | North Central Catchment | 1.37744  | 103.807826 | Tan et al. 2018 | NUS-K0636 |
| <i>M. gularis</i>              | K0670 | 4/12/2013  | North Central Catchment | 1.37744  | 103.807826 | Tan et al. 2018 | NUS-K0670 |
| <i>M. gularis</i>              | K0660 | 7/8/2013   | North Central Catchment | 1.372661 | 103.803922 | Tan et al. 2018 | NUS-K0660 |
| <i>M. gularis</i>              | K0646 | 4/6/2013   | North Central Catchment | -        | -          | Tan et al. 2018 | NUS-K0646 |
| <i>M. gularis</i>              | K0653 | 5/6/2013   | North Central Catchment | -        | -          | Tan et al. 2018 | NUS-K0653 |
| <i>M. gularis</i>              | K0655 | 5/6/2013   | North Central Catchment | -        | -          | Tan et al. 2018 | NUS-K0655 |
| <i>M. gularis</i>              | K1109 | 7/1/2014   | South Central Catchment | 1.35595  | 103.801723 | Tan et al. 2018 | NUS-K1109 |
| <i>M. gularis</i>              | K1122 | 10/12/2014 | South Central Catchment | 1.35685  | 103.803733 | this study      | NUS-K1122 |
| <i>M. gularis</i>              | K1107 | 31/12/2013 | South Central Catchment | 1.351502 | 103.806386 | Tan et al. 2018 | NUS-K1107 |
| <i>M. gularis</i>              | J3295 | 30/5/2014  | North Central Catchment | 1.356056 | 103.785652 | Tan et al. 2018 | NUS-J3295 |
| <i>M. gularis</i>              | J3502 | 31/5/2014  | North Central Catchment | 1.356056 | 103.785652 | Tan et al. 2018 | NUS-J3502 |
| <i>M. gularis</i>              | K0630 | 11/5/2013  | South Central Catchment | 1.357036 | 103.812693 | Tan et al. 2018 | NUS-K0630 |
| <i>M. gularis</i> <sup>d</sup> | K0626 | 11/5/2013  | South Central Catchment | 1.357036 | 103.812693 | this study      | NUS-K0626 |
| <i>M. gularis</i>              | K0628 | 11/5/2013  | South Central Catchment | 1.357036 | 103.812693 | Tan et al. 2018 | NUS-K0628 |



|                                |             |            |                            |          |            |                 |                 |
|--------------------------------|-------------|------------|----------------------------|----------|------------|-----------------|-----------------|
| <i>M. gularis</i>              | K0662       | 24/8/2013  | South Central Catchment    | 1.357036 | 103.812693 | Tan et al. 2018 | NUS-K0662       |
| <i>M. gularis</i>              | J38041      | 26/3/2015  | South Central Catchment    | 1.3597   | 103.812817 | this study      | NUS-J38041      |
| <i>M. gularis</i> <sup>d</sup> | K0684       | 25/4/2015  | Bukit Timah Nature Reserve | 1.35576  | 103.783022 | this study      | NUS-K0684       |
| <i>M. gularis</i>              | K0685       | 25/4/2015  | Bukit Timah Nature Reserve | 1.35576  | 103.783022 | Tan et al. 2018 | NUS-K0685       |
| <i>M. gularis</i>              | K0682       | 25/4/2015  | Bukit Timah Nature Reserve | 1.35576  | 103.783022 | Tan et al. 2018 | NUS-K0682       |
| <i>M. gularis</i>              | K0683       | 25/4/2015  | Bukit Timah Nature Reserve | 1.35576  | 103.783022 | Tan et al. 2018 | NUS-K0683       |
| <i>M. gularis</i>              | K0673       | 25/1/2014  | Bukit Timah Nature Reserve | 1.360476 | 103.777391 | Tan et al. 2018 | NUS-K0673       |
| <i>M. gularis</i>              | CR063       | na         | Kent Ridge Park            | 1.291595 | 103.781701 | Tan et al. 2018 | NUS-CR063       |
| <i>M. gularis</i>              | UWBM 117142 | 18/10/2006 | Kent Ridge Park            | 1.286595 | 103.788739 | BMNHC           | NUS-UWBM 117142 |
| <i>M. gularis</i>              | UWBM 117174 | 18/10/2016 | Kent Ridge Park            | 1.286595 | 103.788739 | BMNHC           | NUS-UWBM 117174 |
| <i>M. gularis</i>              | CSW8312     | 18/10/2006 | Kent Ridge Park            | 1.286595 | 103.788739 | Tan et al. 2018 | NUS-CSW8312     |
| <i>M. gularis</i>              | CSW8313     | 18/10/2006 | Kent Ridge Park            | 1.286595 | 103.788739 | Tan et al. 2018 | NUS-CSW8313     |
| <i>M. gularis</i>              | K1112       | 15/1/2014  | Kent Ridge Park            | 1.286595 | 103.788739 | Tan et al. 2018 | NUS-K1112       |
| <i>M. gularis</i>              | K1113       | 15/1/2014  | Kent Ridge Park            | 1.286595 | 103.788739 | Tan et al. 2018 | NUS-K1113       |
| <i>M. gularis</i> <sup>d</sup> | K1114       | 30/1/2014  | Kent Ridge Park            | 1.295293 | 103.777272 | this study      | NUS-K1114       |
| <i>M. gularis</i>              | K1106       | 18/12/2013 | Clementi Woods Park        | 1.300877 | 103.766832 | Tan et al. 2018 | NUS-K1106       |

|                                |       |           |                         |          |            |                 |           |
|--------------------------------|-------|-----------|-------------------------|----------|------------|-----------------|-----------|
| <i>M. gularis</i>              | K1117 | 27/2/2014 | Mt Faber Park           | 1.269568 | 103.821747 | Tan et al. 2018 | NUS-K1117 |
| <i>M. gularis</i>              | K1116 | 27/2/2014 | Mt Faber Park           | 1.269568 | 103.821747 | Tan et al. 2018 | NUS-K1116 |
| <i>M. gularis</i>              | K1115 | 27/2/2014 | Mt Faber Park           | 1.269568 | 103.821747 | Tan et al. 2018 | NUS-K1115 |
| <i>M. gularis</i> <sup>d</sup> | K1102 | 7/11/2013 | Telok Blangah Hill Park | 1.278373 | 103.813504 | this study      | NUS-K1102 |
| <i>M. gularis</i>              | K1118 | 27/5/2014 | Sentosa Island          | 1.257598 | 103.813652 | Tan et al. 2018 | NUS-K1118 |
| <i>M. gularis</i>              | K1119 | 27/5/2014 | Sentosa Island          | 1.257598 | 103.813652 | this study      | NUS-K1119 |
| <i>M. gularis</i> <sup>d</sup> | K1120 | 27/5/2014 | Sentosa Island          | 1.257598 | 103.813652 | this study      | NUS-K1120 |
| <i>M. gularis</i>              | K1153 | 6/10/2015 | Sentosa Island          | 1.35685  | 103.803733 | this study      | NUS-K1153 |
| <i>P. simplex</i> <sup>d</sup> | L2320 | 20/5/2015 | North Central Catchment | 1.38135  | 103.814867 | this study      | NUS-L2320 |
| <i>P. simplex</i>              | L2319 | 20/5/2015 | North Central Catchment | 1.38135  | 103.814867 | this study      | NUS-L2319 |
| <i>P. simplex</i>              | K0652 | 4/6/2013  | North Central Catchment | -        | -          | this study      | NUS-K0652 |
| <i>P. simplex</i> <sup>d</sup> | K0654 | 5/6/2013  | North Central Catchment | -        | -          | this study      | NUS-K0654 |
| <i>P. simplex</i> <sup>d</sup> | K0664 | 3/9/2013  | North Central Catchment | 1.3817   | 103.815383 | this study      | NUS-K0664 |
| <i>P. simplex</i>              | K0665 | 4/9/2013  | North Central Catchment | 1.3817   | 103.815383 | this study      | NUS-K0665 |
| <i>P. simplex</i>              | K0666 | 4/9/2013  | North Central Catchment | 1.3817   | 103.815383 | this study      | NUS-K0666 |
| <i>P. simplex</i> <sup>d</sup> | K0667 | 4/9/2013  | North Central Catchment | 1.3817   | 103.815383 | this study      | NUS-K0667 |

|                                |       |            |                            |          |            |            |           |
|--------------------------------|-------|------------|----------------------------|----------|------------|------------|-----------|
| <i>P. simplex</i> <sup>d</sup> | L0674 | 30/5/2014  | North Central Catchment    | 1.356056 | 103.785652 | this study | NUS-L0674 |
| <i>P. simplex</i> <sup>d</sup> | L1600 | 30/5/2014  | North Central Catchment    | 1.356056 | 103.785652 | this study | NUS-L1600 |
| <i>P. simplex</i> <sup>d</sup> | K1155 | 3/11/2015  | North Central Catchment    | 1.398462 | 103.806807 | this study | NUS-K1155 |
| <i>P. simplex</i>              | K0658 | 10/7/2013  | North Central Catchment    | 1.395656 | 103.804365 | this study | NUS-K0658 |
| <i>P. simplex</i> <sup>d</sup> | L2346 | 24/11/2015 | North Central Catchment    | 1.397582 | 103.80457  | this study | NUS-L2346 |
| <i>P. simplex</i> <sup>d</sup> | L1825 | 11/12/2014 | South Central Catchment    | 1.35685  | 103.803733 | this study | NUS-L1825 |
| <i>P. simplex</i>              | L1828 | 3/3/2015   | South Central Catchment    | 1.350917 | 103.829833 | this study | NUS-L1828 |
| <i>P. simplex</i>              | L1829 | 3/3/2015   | South Central Catchment    | 1.350917 | 103.829833 | this study | NUS-L1829 |
| <i>P. simplex</i>              | L1831 | 4/3/2015   | South Central Catchment    | 1.35295  | 103.8265   | this study | NUS-L1831 |
| <i>P. simplex</i> <sup>d</sup> | L1835 | 5/3/2015   | South Central Catchment    | 1.35225  | 103.828233 | this study | NUS-L1835 |
| <i>P. simplex</i> <sup>d</sup> | M1125 | 3/3/2015   | South Central Catchment    | 1.350917 | 103.829833 | this study | NUS-M1125 |
| <i>P. simplex</i> <sup>d</sup> | M1134 | 19/8/2015  | South Central Catchment    | 1.348607 | 103.803114 | this study | NUS-M1134 |
| <i>P. simplex</i>              | M1133 | 19/8/2015  | South Central Catchment    | 1.348607 | 103.803114 | this study | NUS-M1133 |
| <i>P. simplex</i> <sup>d</sup> | L2301 | 25/3/2015  | South Central Catchment    | 1.355    | 103.813017 | this study | NUS-L2301 |
| <i>P. simplex</i> <sup>d</sup> | K1133 | 17/11/2015 | Bukit Timah Nature Reserve | 1.350134 | 103.779752 | this study | NUS-K1133 |
| <i>P. plumosus</i>             | M1109 | 13/12/2013 | Admiralty Park             | 1.449878 | 103.778439 | this study | NUS-M1109 |

|                                 |       |            |                         |          |            |            |           |
|---------------------------------|-------|------------|-------------------------|----------|------------|------------|-----------|
| <i>P. plumosus</i> <sup>d</sup> | M1111 | 13/12/2013 | Admiralty Park          | 1.449878 | 103.778439 | this study | NUS-M1111 |
| <i>P. plumosus</i>              | M0969 | 30/5/2014  | North Central Catchment | 1.356056 | 103.785652 | this study | NUS-M0969 |
| <i>P. plumosus</i>              | M0968 | 30/5/2014  | North Central Catchment | 1.356056 | 103.785652 | this study | NUS-M0968 |
| <i>P. plumosus</i>              | M0973 | 31/5/2014  | North Central Catchment | 1.356056 | 103.785652 | this study | NUS-M0973 |
| <i>P. plumosus</i>              | M0972 | 31/5/2014  | North Central Catchment | 1.356056 | 103.785652 | this study | NUS-M0972 |
| <i>P. plumosus</i>              | M0970 | 31/5/2014  | North Central Catchment | 1.356056 | 103.785652 | this study | NUS-M0970 |
| <i>P. plumosus</i>              | L0655 | 30/5/2014  | North Central Catchment | 1.356056 | 103.785652 | this study | NUS-L0655 |
| <i>P. plumosus</i>              | M0971 | 31/5/2014  | North Central Catchment | 1.356056 | 103.785652 | this study | NUS-M0971 |
| <i>P. plumosus</i>              | M1113 | 3/1/2014   | North Central Catchment | 1.383779 | 103.800888 | this study | NUS-M1113 |
| <i>P. plumosus</i>              | M0927 | 5/6/2013   | North Central Catchment | -        | -          | this study | NUS-M0927 |
| <i>P. plumosus</i>              | M0935 | 4/9/2013   | North Central Catchment | 1.3817   | 103.815383 | this study | NUS-M0935 |
| <i>P. plumosus</i>              | M0933 | 7/8/2013   | North Central Catchment | 1.372661 | 103.803922 | this study | NUS-M0933 |
| <i>P. plumosus</i>              | M0932 | 7/8/2013   | North Central Catchment | 1.372661 | 103.803922 | this study | NUS-M0932 |
| <i>P. plumosus</i>              | M0918 | 21/5/2013  | North Central Catchment | 1.37744  | 103.807826 | this study | NUS-M0918 |
| <i>P. plumosus</i>              | M0922 | 22/5/2013  | North Central Catchment | 1.37744  | 103.807826 | this study | NUS-M0922 |
| <i>P. plumosus</i>              | M0936 | 3/11/2015  | North Central Catchment | 1.397722 | 103.806375 | this study | NUS-M0936 |

|                                 |       |            |                         |          |            |            |           |
|---------------------------------|-------|------------|-------------------------|----------|------------|------------|-----------|
| <i>P. plumosus</i>              | M1114 | 9/1/2014   | North Central Catchment | 1.35595  | 103.801723 | this study | NUS-M1114 |
| <i>P. plumosus</i>              | M0930 | 10/7/2013  | North Central Catchment | 1.398979 | 103.807907 | this study | NUS-M0930 |
| <i>P. plumosus</i>              | L1589 | 6/9/2014   | North Central Catchment | 1.359081 | 103.782795 | this study | NUS-L1589 |
| <i>P. plumosus</i> <sup>e</sup> | K0651 | 4/6/2013   | North Central Catchment | -        | -          | this study | NUS-K0651 |
| <i>P. plumosus</i>              | M0931 | 27/7/2013  | South Central Catchment | 1.357036 | 103.812693 | this study | NUS-M0931 |
| <i>P. plumosus</i>              | L1568 | 11/5/2013  | South Central Catchment | 1.357036 | 103.812693 | this study | NUS-L1568 |
| <i>P. plumosus</i>              | L1567 | 11/5/2013  | South Central Catchment | 1.357036 | 103.812693 | this study | NUS-L1567 |
| <i>P. plumosus</i>              | M0999 | 20/6/2014  | South Central Catchment | 1.348769 | 103.813112 | this study | NUS-M0999 |
| <i>P. plumosus</i>              | M1000 | 21/6/2014  | South Central Catchment | 1.348769 | 103.813112 | this study | NUS-M1000 |
| <i>P. plumosus</i>              | M0031 | 21/6/2014  | South Central Catchment | 1.348769 | 103.813112 | this study | NUS-M0031 |
| <i>P. plumosus</i>              | M1102 | 17/10/2013 | South Central Catchment | 1.355264 | 103.798923 | this study | NUS-M1102 |
| <i>P. plumosus</i>              | L2310 | 7/4/2015   | South Central Catchment | 1.340867 | 103.820167 | this study | NUS-L2310 |
| <i>P. plumosus</i>              | L2311 | 7/4/2015   | South Central Catchment | 1.3431   | 103.822317 | this study | NUS-L2311 |
| <i>P. plumosus</i>              | L0975 | 25/3/2015  | South Central Catchment | 1.359549 | 103.812882 | this study | NUS-L0975 |
| <i>P. plumosus</i> <sup>e</sup> | M0914 | 21/9/2013  | South Central Catchment | -        | -          | this study | NUS-M0914 |
| <i>P. plumosus</i>              | M1106 | 10/12/2013 | Bukit Batok Nature Park | 1.348233 | 103.762454 | this study | NUS-M1106 |

|                                 |       |            |                            |          |            |            |           |
|---------------------------------|-------|------------|----------------------------|----------|------------|------------|-----------|
| <i>P. plumosus</i> <sup>d</sup> | M1105 | 10/12/2013 | Bukit Batok Nature Park    | 1.348233 | 103.762454 | this study | NUS-M1105 |
| <i>P. plumosus</i>              | M1107 | 10/12/2013 | Bukit Batok Nature Park    | 1.348233 | 103.762454 | this study | NUS-M1107 |
| <i>P. plumosus</i> <sup>e</sup> | M1108 | 10/12/2013 | Bukit Batok Nature Park    | -        | -          | this study | NUS-M1108 |
| <i>P. plumosus</i>              | M0948 | 25/4/2014  | Bukit Timah Nature Reserve | 1.35576  | 103.783022 | this study | NUS-M0948 |
| <i>P. plumosus</i>              | M0946 | 25/4/2014  | Bukit Timah Nature Reserve | 1.35576  | 103.783022 | this study | NUS-M0946 |
| <i>P. plumosus</i>              | M0949 | 25/4/2014  | Bukit Timah Nature Reserve | 1.35576  | 103.783022 | this study | NUS-M0949 |
| <i>P. plumosus</i>              | M0947 | 25/4/2014  | Bukit Timah Nature Reserve | 1.35576  | 103.783022 | this study | NUS-M0947 |
| <i>P. plumosus</i>              | N0943 | 22/3/2014  | Bukit Timah Nature Reserve | 1.360476 | 103.777391 | this study | NUS-N0943 |
| <i>P. plumosus</i>              | M0940 | 24/1/2014  | Bukit Timah Nature Reserve | 1.360476 | 103.777391 | this study | NUS-M0940 |
| <i>P. plumosus</i>              | L0691 | 22/3/2014  | Bukit Timah Nature Reserve | 1.360476 | 103.777391 | this study | NUS-L0691 |
| <i>P. plumosus</i>              | M1241 | 13/9/2014  | Bukit Timah Nature Reserve | 1.360476 | 103.777391 | this study | NUS-M1241 |
| <i>P. plumosus</i>              | M0912 | 21/3/2014  | Bukit Timah Nature Reserve | 1.360476 | 103.777391 | this study | NUS-M0912 |
| <i>P. plumosus</i>              | M0945 | 12/4/2014  | Bukit Timah Nature Reserve | 1.360476 | 103.777391 | this study | NUS-M0945 |
| <i>P. plumosus</i>              | M0942 | 25/1/2014  | Bukit Timah Nature Reserve | 1.360476 | 103.777391 | this study | NUS-M0942 |
| <i>P. plumosus</i>              | M1112 | 18/12/2013 | Clementi Woods Park        | 1.300877 | 103.766832 | this study | NUS-M1112 |
| <i>P. plumosus</i>              | M1117 | 24/2/2014  | Mt Faber Park              | 1.269568 | 103.821747 | this study | NUS-M1117 |

|                                 |             |            |                |          |            |            |                 |
|---------------------------------|-------------|------------|----------------|----------|------------|------------|-----------------|
| <i>P. plumosus</i>              | M1116       | 24/2/2014  | Mt Faber Park  | 1.269568 | 103.821747 | this study | NUS-M1116       |
| <i>P. plumosus</i>              | M1103       | 31/10/2013 | Mt Faber Park  | 1.269568 | 103.821747 | this study | NUS-M1103       |
| <i>P. plumosus</i>              | M1104       | 31/10/2013 | Mt Faber Park  | 1.269568 | 103.821747 | this study | NUS-M1104       |
| <i>P. plumosus</i> <sup>d</sup> | M1118       | 27/5/2014  | Sentosa Island | 1.257598 | 103.813652 | this study | NUS-M1118       |
| <i>P. plumosus</i>              | M1144       | 6/10/2015  | Sentosa Island | 1.256867 | 103.813696 | this study | NUS-M1144       |
| <i>P. plumosus</i> <sup>e</sup> | UWBM 81977  | 29/12/1998 | Sentosa Island | 1.2603   | 103.8281   | BMNHC      | NUS-UWBM 81977  |
| <i>P. plumosus</i>              | UWBM 116734 | 4/5/2012   | Semakau Island | 1.20706  | 103.759081 | BMNHC      | NUS-UWBM 116734 |
| <i>P. plumosus</i>              | UWBM 116735 | 6/5/2012   | Semakau Island | 1.20706  | 103.759081 | BMNHC      | NUS-UWBM 116735 |
| <i>P. plumosus</i>              | UWBM 116736 | 6/5/2012   | Semakau Island | 1.20706  | 103.759081 | BMNHC      | NUS-UWBM 116736 |
| <i>P. plumosus</i>              | UWBM 116737 | 6/5/2012   | Semakau Island | 1.20706  | 103.759081 | BMNHC      | NUS-UWBM 116737 |
| <i>P. plumosus</i>              | UWBM 116738 | 5/5/2012   | Semakau Island | 1.20706  | 103.759081 | BMNHC      | NUS-UWBM 116738 |
| <i>P. plumosus</i>              | UWBM 116739 | 5/5/2012   | Semakau Island | 1.20706  | 103.759081 | BMNHC      | NUS-UWBM 116739 |
| <i>P. plumosus</i>              | UWBM 116730 | 4/5/2012   | Semakau Island | 1.20706  | 103.759081 | BMNHC      | NUS-UWBM 116730 |
| <i>P. plumosus</i>              | UWBM 117299 | 5/5/2012   | Semakau Island | 1.20706  | 103.759081 | BMNHC      | NUS-UWBM 117299 |
| <i>P. plumosus</i>              | UWBM 81971  | 4/9/1998   | Semakau Island | 1.20706  | 103.759081 | BMNHC      | NUS-UWBM 81971  |
| <i>P. plumosus</i>              | UWBM 83479  | 8/4/2005   | Semakau Island | 1.20706  | 103.759081 | BMNHC      | NUS-UWBM 83479  |

|                                 |             |           |                          |          |            |            |                 |
|---------------------------------|-------------|-----------|--------------------------|----------|------------|------------|-----------------|
| <i>P. plumosus</i>              | UWBM 89181  | 12/5/2004 | Semakau Island           | 1.20706  | 103.759081 | BMNHC      | NUS-UWBM 89181  |
| <i>P. plumosus</i>              | UWBM116727  | na        | Semakau Island           | 1.20706  | 103.759081 | BMNHC      | NUS-UWBM116727  |
| <i>P. plumosus</i>              | UWBM 116732 | na        | Semakau Island           | 1.20706  | 103.759081 | BMNHC      | NUS-UWBM 116732 |
| <i>P. plumosus</i>              | UWBM 116733 | na        | Semakau Island           | 1.20706  | 103.759081 | BMNHC      | NUS-UWBM 116733 |
| <i>P. plumosus</i> <sup>d</sup> | M0834       | 22/8/2013 | Ubin Island              | 1.412226 | 103.966195 | this study | NUS-M0834       |
| <i>P. plumosus</i>              | M1402       | 21/8/2014 | Ubin Island              | 1.412226 | 103.966195 | this study | NUS-M1402       |
| <i>P. plumosus</i>              | M0832       | 22/8/2013 | Ubin Island              | 1.412226 | 103.966195 | this study | NUS-M0832       |
| <i>P. plumosus</i>              | M0830       | 22/8/2013 | Ubin Island              | 1.412226 | 103.966195 | this study | NUS-M0830       |
| <i>P. plumosus</i>              | N0836       | 22/8/2013 | Ubin Island              | 1.412226 | 103.966195 | this study | NUS-N0836       |
| <i>P. plumosus</i>              | L1736       | 26/6/2014 | Ubin Island              | 1.412226 | 103.966195 | this study | NUS-L1736       |
| <i>P. plumosus</i> <sup>e</sup> | M0831       | 22/8/2013 | Ubin Island              | -        | -          | this study | NUS-M0831       |
| <i>P. plumosus</i> <sup>e</sup> | UWBM 82005  | 10/5/1999 | Tekong Island            | 1.4051   | 104.0503   | BMNHC      | NUS-UWBM 82005  |
| <i>P. plumosus</i> <sup>e</sup> | UWBM 67504  | 22/5/2001 | Sungei Buloh Nature Park | 1.4448   | 103.7258   | BMNHC      | NUS-UWBM 67504  |

<sup>a</sup>Refers to voucher numbers for samples from museum collections and to field numbers for samples specifically collected for this study

<sup>b</sup>Refers to sampling date in the field



<sup>c</sup>Indicates “this study” for samples mist-netted, blood-sampled, ringed and released specifically for this project; otherwise museum source is provided: BMNHC – Burke Museum of Natural History and Culture, Seattle, Washington; LKCNHM – Lee Kong Chian Natural History Museum, Singapore. ”Tan et al. 2018” for samples sequenced a part of this published study.

<sup>d</sup>Denotes samples additionally used in the comparative analysis with contiguous forest

<sup>e</sup>Denotes samples discarded after quality check

**Table S2.** Non-Singaporean samples of *Pellorneum malaccense*, *Cyanoderma erythropterum*, *Mixornis gularis*, *Pycnonotus plumosus*, and *Pycnonotus simplex* used in this study.

| <b>Species</b>       | <b>Sample ID<sup>a</sup></b> | <b>Country</b> | <b>Sampling locality</b> | <b>Source<sup>b</sup></b> | <b>GenBank sample name</b> |
|----------------------|------------------------------|----------------|--------------------------|---------------------------|----------------------------|
| <i>P. malaccense</i> | B2002                        | Malaysia       | Sabah, Danum Valley      | this study                | NUS-B2002                  |
| <i>P. malaccense</i> | B2042                        | Malaysia       | Sabah, Danum Valley      | this study                | NUS-B2042                  |
| <i>P. malaccense</i> | B2046                        | Malaysia       | Sabah, Danum Valley      | this study                | NUS-B2046                  |
| <i>P. malaccense</i> | B2053                        | Malaysia       | Sabah, Danum Valley      | this study                | NUS-B2053                  |
| <i>P. malaccense</i> | B2057                        | Malaysia       | Sabah, Danum Valley      | this study                | NUS-B2057                  |
| <i>P. malaccense</i> | B2113                        | Malaysia       | Sabah, Danum Valley      | this study                | NUS-B2113                  |
| <i>P. malaccense</i> | B2114                        | Malaysia       | Sabah, Danum Valley      | this study                | NUS-B2114                  |
| <i>P. malaccense</i> | B2203                        | Malaysia       | Sabah, Danum Valley      | this study                | NUS-B2203                  |
| <i>P. malaccense</i> | B2206                        | Malaysia       | Sabah, Danum Valley      | this study                | NUS-B2206                  |
| <i>P. malaccense</i> | B2228                        | Malaysia       | Sabah, Danum Valley      | this study                | NUS-B2228                  |
| <i>P. malaccense</i> | B2243                        | Malaysia       | Sabah, Danum Valley      | this study                | NUS-B2243                  |
| <i>P. malaccense</i> | B2245                        | Malaysia       | Sabah, Danum Valley      | this study                | NUS-B2245                  |
| <i>P. malaccense</i> | B2551                        | Malaysia       | Sabah, Danum Valley      | this study                | NUS-B2551                  |

|                         |              |          |                             |            |                  |
|-------------------------|--------------|----------|-----------------------------|------------|------------------|
| <i>P. malaccense</i>    | B2594        | Malaysia | Sabah, Danum Valley         | this study | NUS-B2594        |
| <i>C. erythropterum</i> | A2939        | Malaysia | Sabah, Danum Valley         | this study | NUS-A2939        |
| <i>C. erythropterum</i> | A2942        | Malaysia | Sabah, Danum Valley         | this study | NUS-A2942        |
| <i>C. erythropterum</i> | A3061        | Malaysia | Sabah, Danum Valley         | this study | NUS-A3061        |
| <i>C. erythropterum</i> | A3405        | Malaysia | Sabah, Danum Valley         | this study | NUS-A3405        |
| <i>C. erythropterum</i> | A3422        | Malaysia | Sabah, Danum Valley         | this study | NUS-A3422        |
| <i>C. erythropterum</i> | B2121        | Malaysia | Sabah, Danum Valley         | this study | NUS-B2121        |
| <i>M. gularis</i>       | NRM20046847  | Vietnam  | Quang Tri, Dakrong Bridge   | SMNH       | NUS-NRM20046847  |
| <i>M. gularis</i>       | NRM 20046881 | Vietnam  | Quang Tri, Dakrong Bridge   | SMNH       | NUS-NRM 20046881 |
| <i>M. gularis</i>       | NRM 20046895 | Vietnam  | Quang Tri, Dakrong Bridge   | SMNH       | NUS-NRM 20046895 |
| <i>M. gularis</i>       | NRM 20046910 | Vietnam  | Quang Tri, Dakrong Bridge   | SMNH       | NUS-NRM 20046910 |
| <i>M. gularis</i>       | NRM 20046920 | Vietnam  | Quang Tri, Dakrong Bridge   | SMNH       | NUS-NRM 20046920 |
| <i>M. gularis</i>       | NRM 20046948 | Vietnam  | Quang Tri, Dakrong Bridge   | SMNH       | NUS-NRM 20046948 |
| <i>M. gularis</i>       | NRM 20046968 | Vietnam  | Quang Tri, Dakrong, A. Dang | SMNH       | NUS-NRM 20046968 |
| <i>M. gularis</i>       | NRM 20047044 | Vietnam  | Quang Tri, Dakrong, A. Dang | SMNH       | NUS-NRM 20047044 |
| <i>P. simplex</i>       | UWBM 81914   | Malaysia | Sarawak, Bako National Park | BMNHC      | NUS-UWBM 81914   |

|                    |            |          |                             |       |                |
|--------------------|------------|----------|-----------------------------|-------|----------------|
| <i>P. simplex</i>  | UWBM 81919 | Malaysia | Sarawak, Bako National Park | BMNHC | NUS-UWBM 81919 |
| <i>P. simplex</i>  | UWBM 81923 | Malaysia | Sarawak, Bako National Park | BMNHC | NUS-UWBM 81923 |
| <i>P. simplex</i>  | UWBM 81924 | Malaysia | Sarawak, Bako National Park | BMNHC | NUS-UWBM 81924 |
| <i>P. simplex</i>  | UWBM 81925 | Malaysia | Sarawak, Bako National Park | BMNHC | NUS-UWBM 81925 |
| <i>P. simplex</i>  | UWBM 81927 | Malaysia | Sarawak, Bako National Park | BMNHC | NUS-UWBM 81927 |
| <i>P. simplex</i>  | UWBM 81928 | Malaysia | Sarawak, Bako National Park | BMNHC | NUS-UWBM 81928 |
| <i>P. simplex</i>  | UWBM 82062 | Malaysia | Sarawak, Bako National Park | BMNHC | NUS-UWBM 82062 |
| <i>P. simplex</i>  | UWBM 82072 | Malaysia | Sarawak, Bako National Park | BMNHC | NUS-UWBM 82072 |
| <i>P. simplex</i>  | UWBM 82073 | Malaysia | Sarawak, Bako National Park | BMNHC | NUS-UWBM 82073 |
| <i>P. simplex</i>  | UWBM 82085 | Malaysia | Sarawak, Bako National Park | BMNHC | NUS-UWBM 82085 |
| <i>P. simplex</i>  | UWBM 82088 | Malaysia | Sarawak, Bako National Park | BMNHC | NUS-UWBM 82088 |
| <i>P. simplex</i>  | UWBM 82089 | Malaysia | Sarawak, Bako National Park | BMNHC | NUS-UWBM 82089 |
| <i>P. simplex</i>  | UWBM 82090 | Malaysia | Sarawak, Bako National Park | BMNHC | NUS-UWBM 82090 |
| <i>P. plumosus</i> | UWBM 81909 | Malaysia | Sarawak, Bako National Park | BMNHC | NUS-UWBM 81909 |
| <i>P. plumosus</i> | UWBM 81915 | Malaysia | Sarawak, Bako National Park | BMNHC | NUS-UWBM 81915 |
| <i>P. plumosus</i> | UWBM 81934 | Malaysia | Sarawak, Bako National Park | BMNHC | NUS-UWBM 81934 |

|                                 |            |          |                             |       |                |
|---------------------------------|------------|----------|-----------------------------|-------|----------------|
| <i>P. plumosus</i>              | UWBM 81936 | Malaysia | Sarawak, Bako National Park | BMNHC | NUS-UWBM 81936 |
| <i>P. plumosus</i> <sup>c</sup> | UWBM 81913 | Malaysia | Sarawak                     | BMNHC | NUS-UWBM 81913 |

<sup>a</sup>Refers to voucher numbers for samples from museum collections and to field numbers for samples specifically collected for this study

<sup>b</sup>Indicates “this study” for samples mist-netted, blood-sampled, ringed and released specifically for this project; otherwise museum source is provided: BMNHC – Burke Museum of Natural History and Culture, Seattle, Washington; LKCNHM – Lee Kong Chian Natural History Museum, Singapore

<sup>c</sup>Denotes samples discarded after quality check

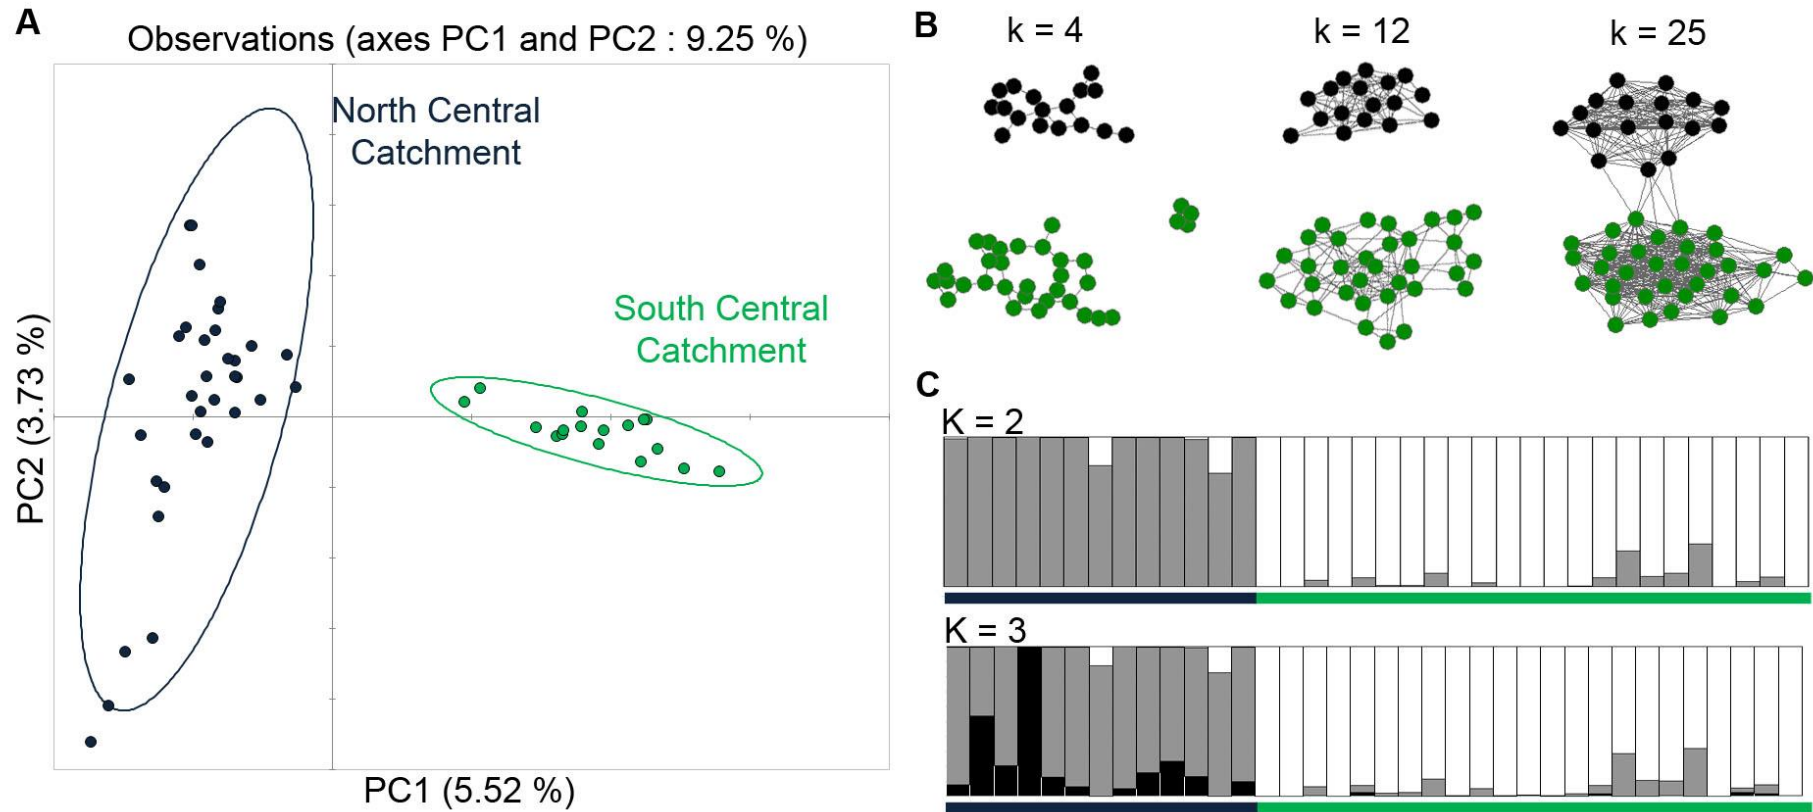

**Fig. S1.** Population structure of *Pellorneum malaccense* in Singapore. A: Principal component (PC) analysis of SNP data with a 95% confidence ellipse; B: Population clustering based on network analysis at  $k=4, 12, 25$ . Dot color indicates sampling localities; C: STRUCTURE analysis at  $K=2$  (optimal  $K$  from Evanno's method, see Methods section 2.5) and at  $K=3$ . Horizontal bar color indicates sampling localities (see Supporting Information for sample ID and information).

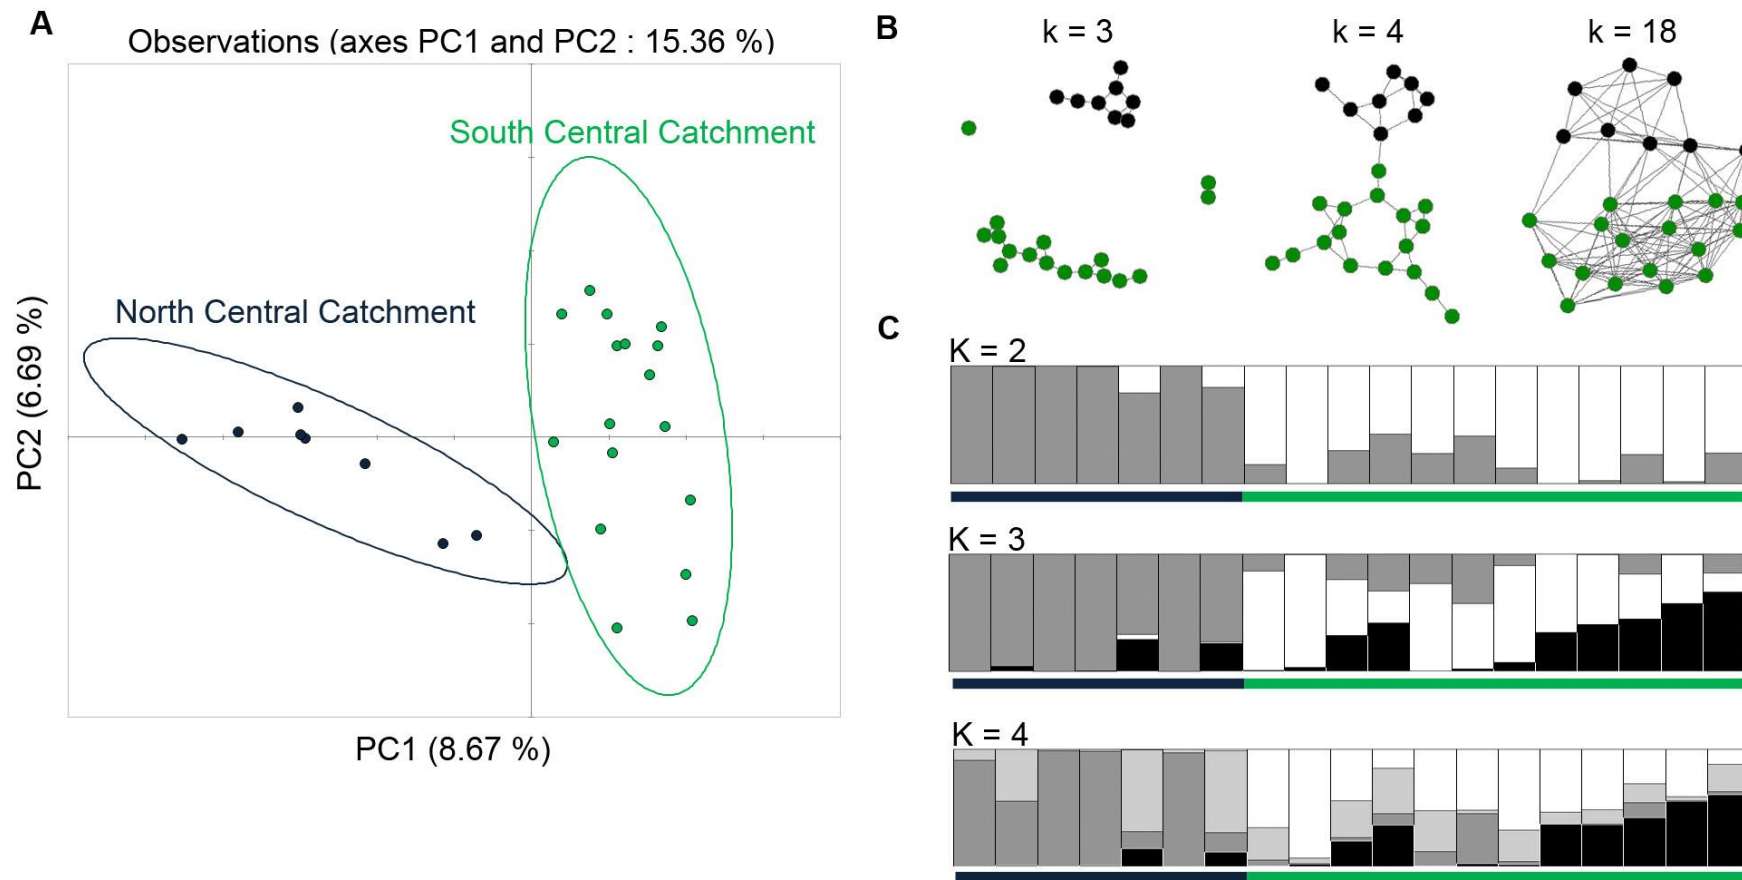

**Fig. S2.** Population structure of *Cyanoderma erythropterum* in Singapore. A: Principal component (PC) analysis of SNP data with a 95% confidence ellipse; B: Population clustering based on network analysis at  $k=3, 4, 18$ . Dot color indicates sampling localities; C: STRUCTURE analysis at  $K=2-3$  and at  $K=4$  (optimal  $K$  from Evanno's method, see Methods section 2.5). Horizontal bar color indicates sampling localities (see Supporting Information for sample ID and information).

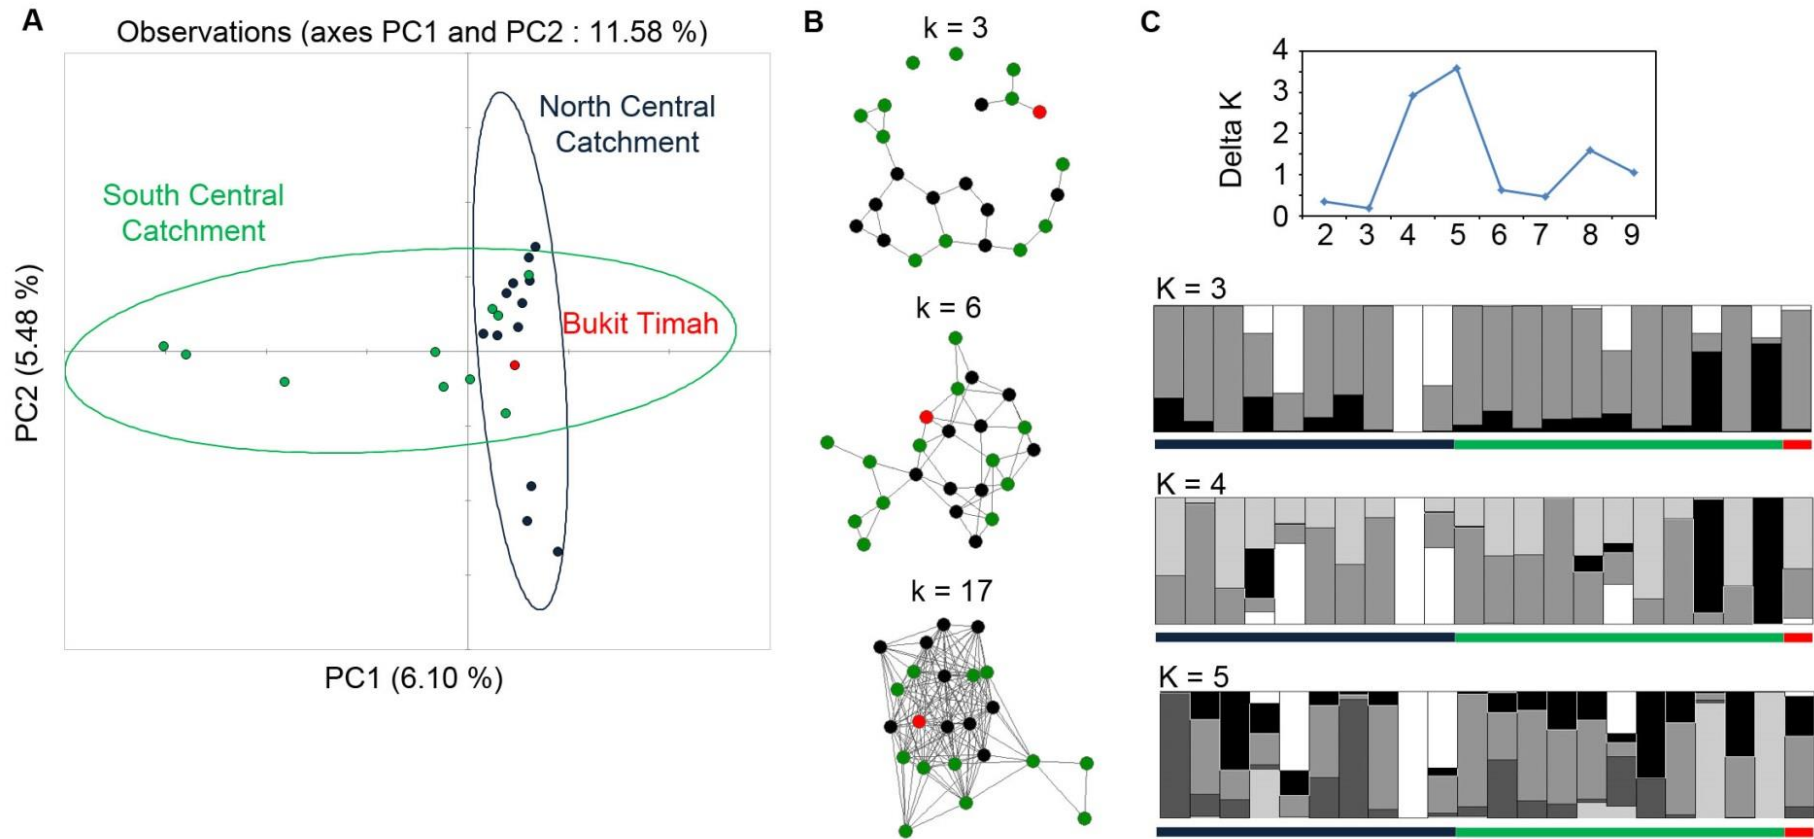

**Fig. S3.** Population structure of *Pycnonotus simplex* in Singapore. A: Principal component (PC) analysis of SNP data with a 95% confidence ellipse; B: Population clustering based on network analysis at  $k=3, 6, 17$ . Dot color indicates sampling localities; C: STRUCTURE analysis at  $K=3-5$ . Evanno's Delta K (see Methods section 2.5) values are low and suggest no considerable population structure. Horizontal bar color indicates sampling localities (see Supporting Information for sample ID and information).



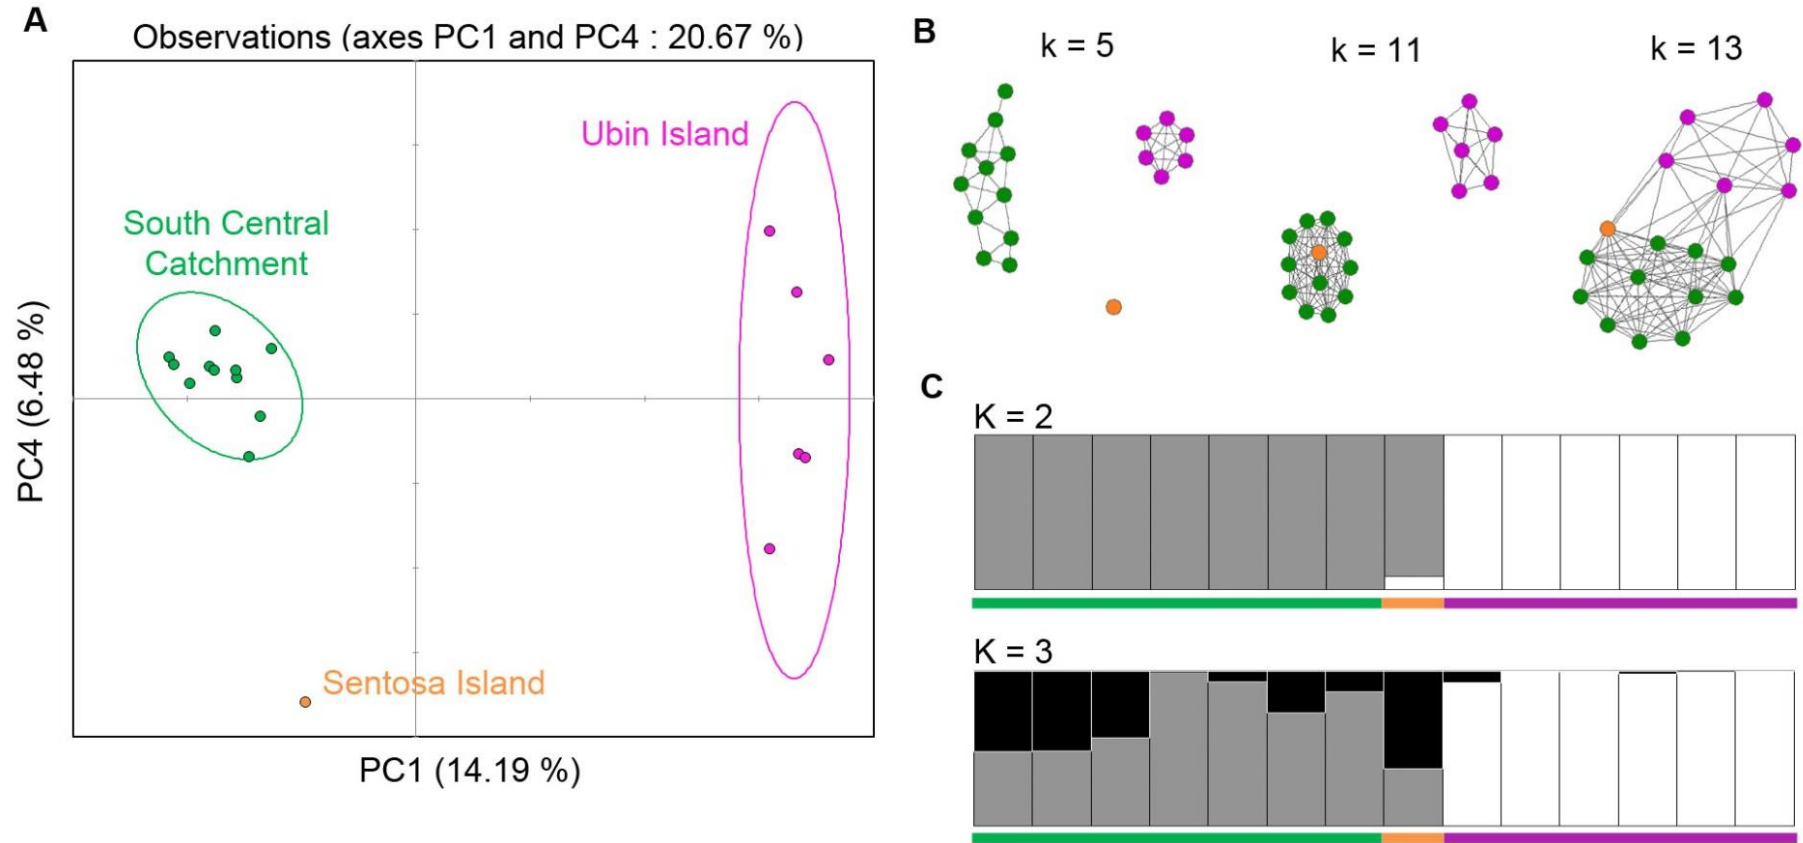

**Fig. S4.** Population structure of *Turdinus abbotti* in Singapore. A: Principal component (PC) analysis of SNP data with a 95% confidence ellipse; B: Population clustering based on network analysis at  $k=5$ , 11, 13. Dot color indicates sampling localities; C: STRUCTURE analysis at  $K=2$  (optimal  $K$  from Evanno's method, see Methods section 2.5) and  $K=3$ . Horizontal bar color indicates sampling localities (see Supporting Information for sample ID and information).

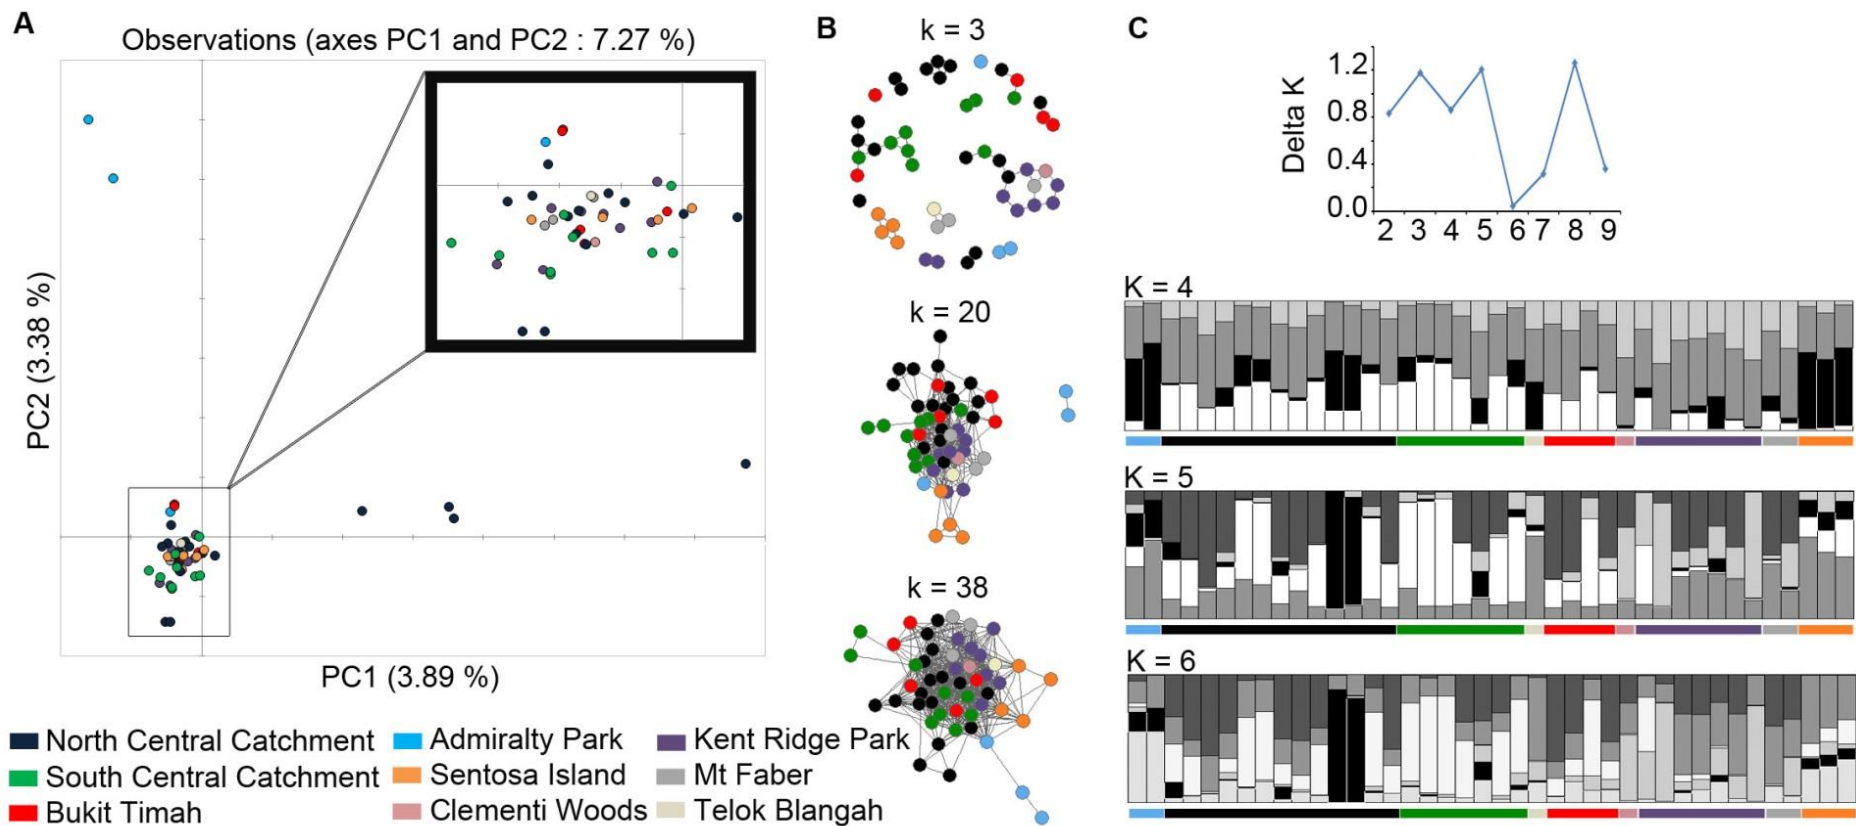

**Fig. S5.** Population structure of *Mixornis gularis* in Singapore. A: Principal component (PC) analysis of SNP data with a 95% confidence ellipse; B: Population clustering based on network analysis at  $k=3, 20, 38$ . Dot color indicates sampling localities; C: STRUCTURE analysis at  $K=4-6$ . Evanno's Delta K values (see Methods section 2.5) are low and suggest no considerable population structure. Horizontal bar color indicates sampling localities (see Supporting Information for sample ID and information).

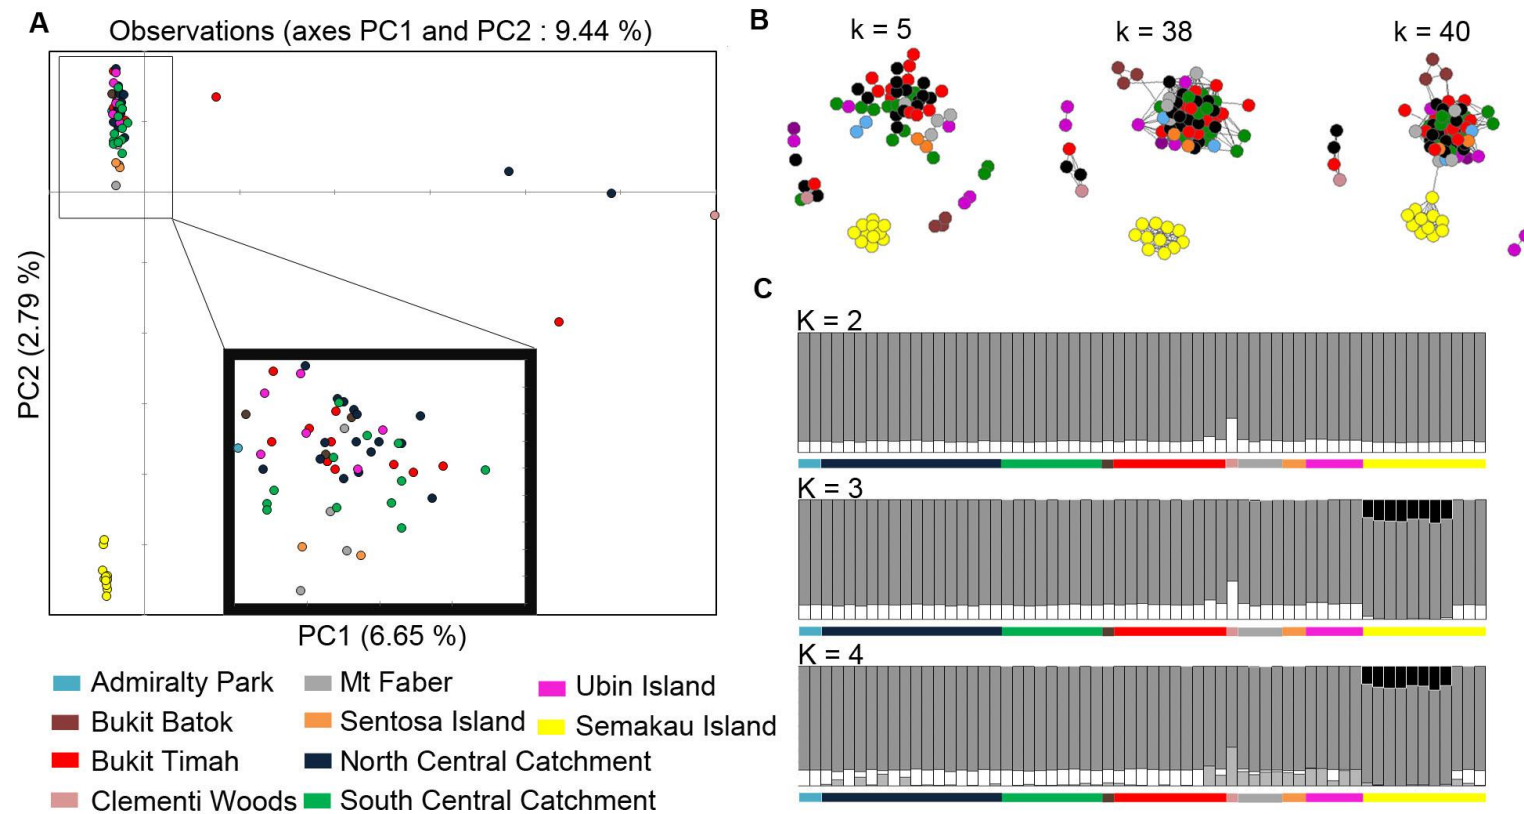

**Fig. S6.** Population structure of *Pycnonotus plumosus* in Singapore. A: Principal component (PC) analysis of SNP data with a 95% confidence ellipse; B: Population clustering based on network analysis at  $k=5$ , 38, 40. Dot color indicates sampling localities; C: STRUCTURE analysis at  $K=2-3$  and at  $K=4$  (optimal  $K$  from Evanno's method, see Methods section 2.5). Horizontal bar color indicates sampling localities (see Supporting Information for sample ID and information).

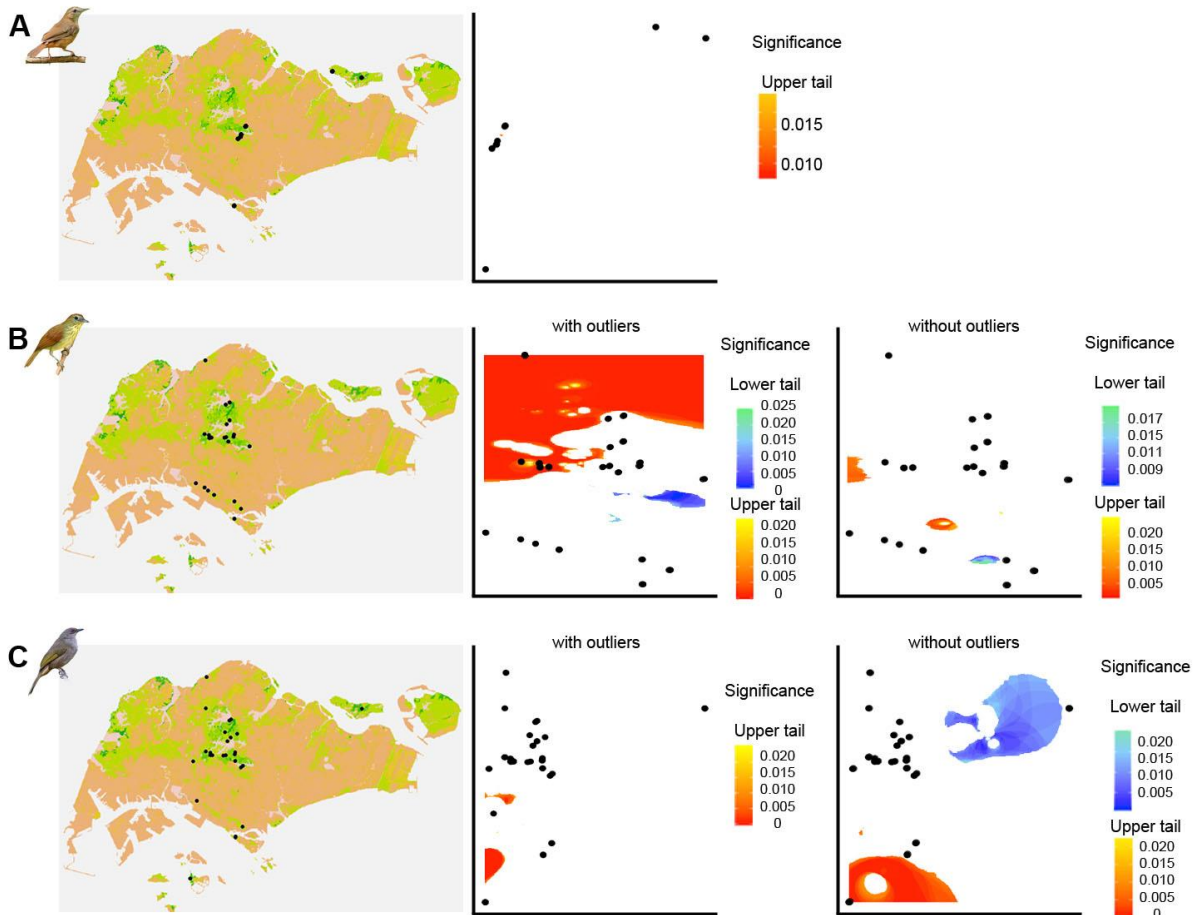

**Fig. S7.** Barriers to and conduits for gene flow in (A) *Turdinus abbotti*, (B) *Mixornis gularis* and (C) *Pycnonotus plumosus* using spatially explicit individual based analysis. Significant deviations ( $p < 0.05$ ) from assumptions under isolation by distance are shown in hues of red and indicate the presence of areas between individuals separated by a comparatively high genetic distance, constituting potential barriers. A genetic similarity significantly higher than expected from isolation by distance is shown in hues of blue, indicating areas between individuals separated by comparatively low genetic distance, constituting potential corridors for gene flow (see Supporting Information for sample ID and information). Bird pictures courtesy of Daniel Koh.

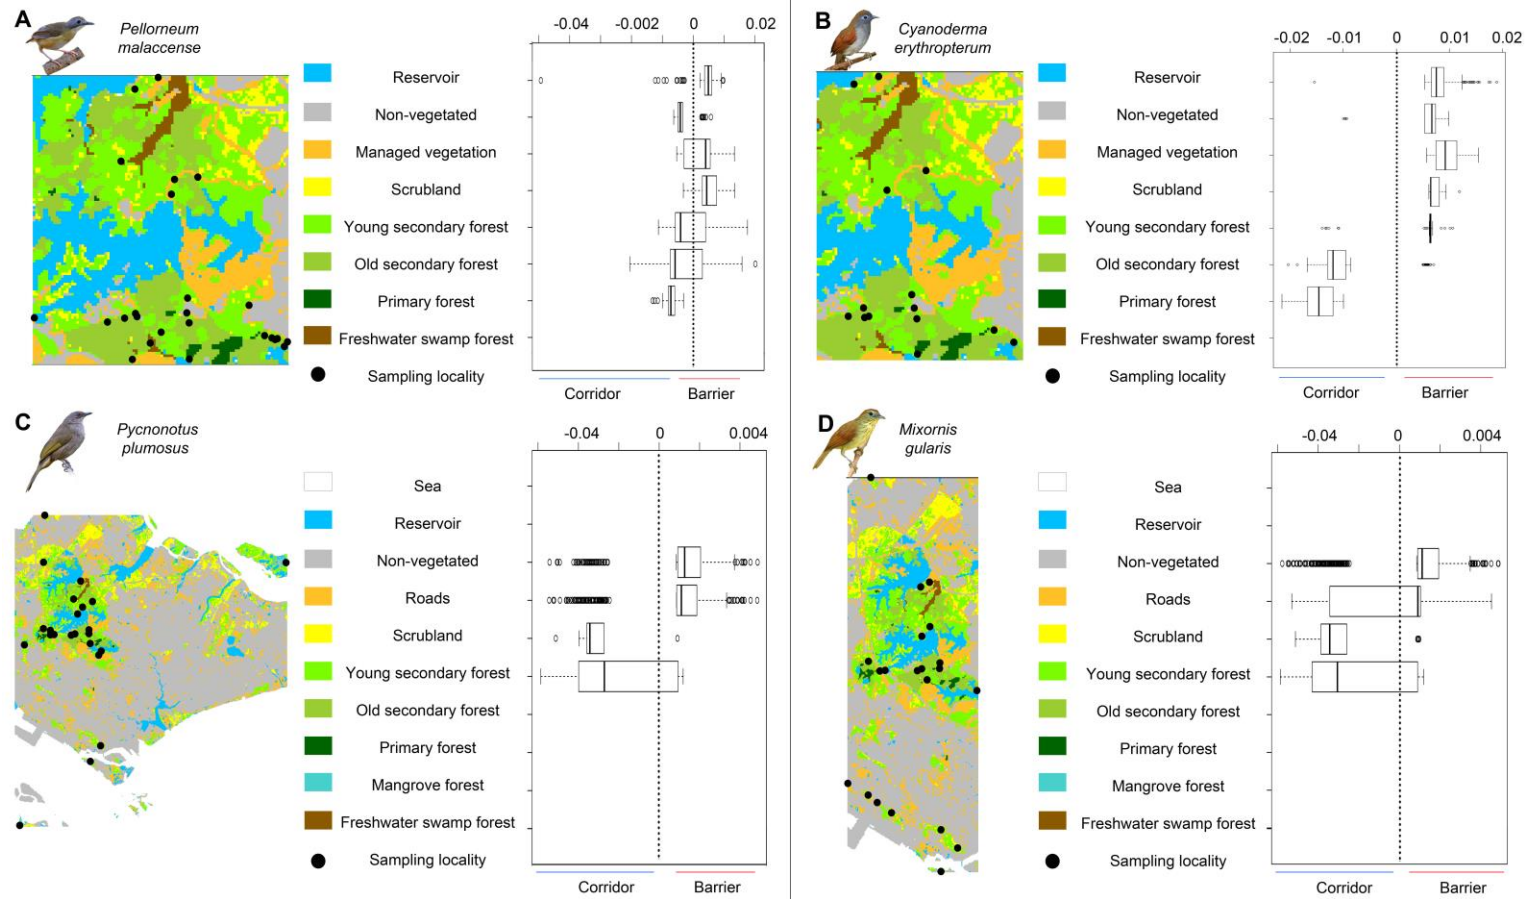

**Fig. S8.** Level of resistance of landscape features for (A) *Pellorneum malaccense*, (B) *Cyanoderma erythropterum*, (C) *Pycnonotus plumosus*, and (D) *Mixornis gularis* in Singapore. The maps (modified from Yee, Corlett, Liew, & Tan (2011)) show landscape features and sampling localities. The box plots indicate the level of resistance of each landscape feature, with positive values indicating potential barriers and negative values potential corridors. Bird pictures courtesy of Daniel Koh.



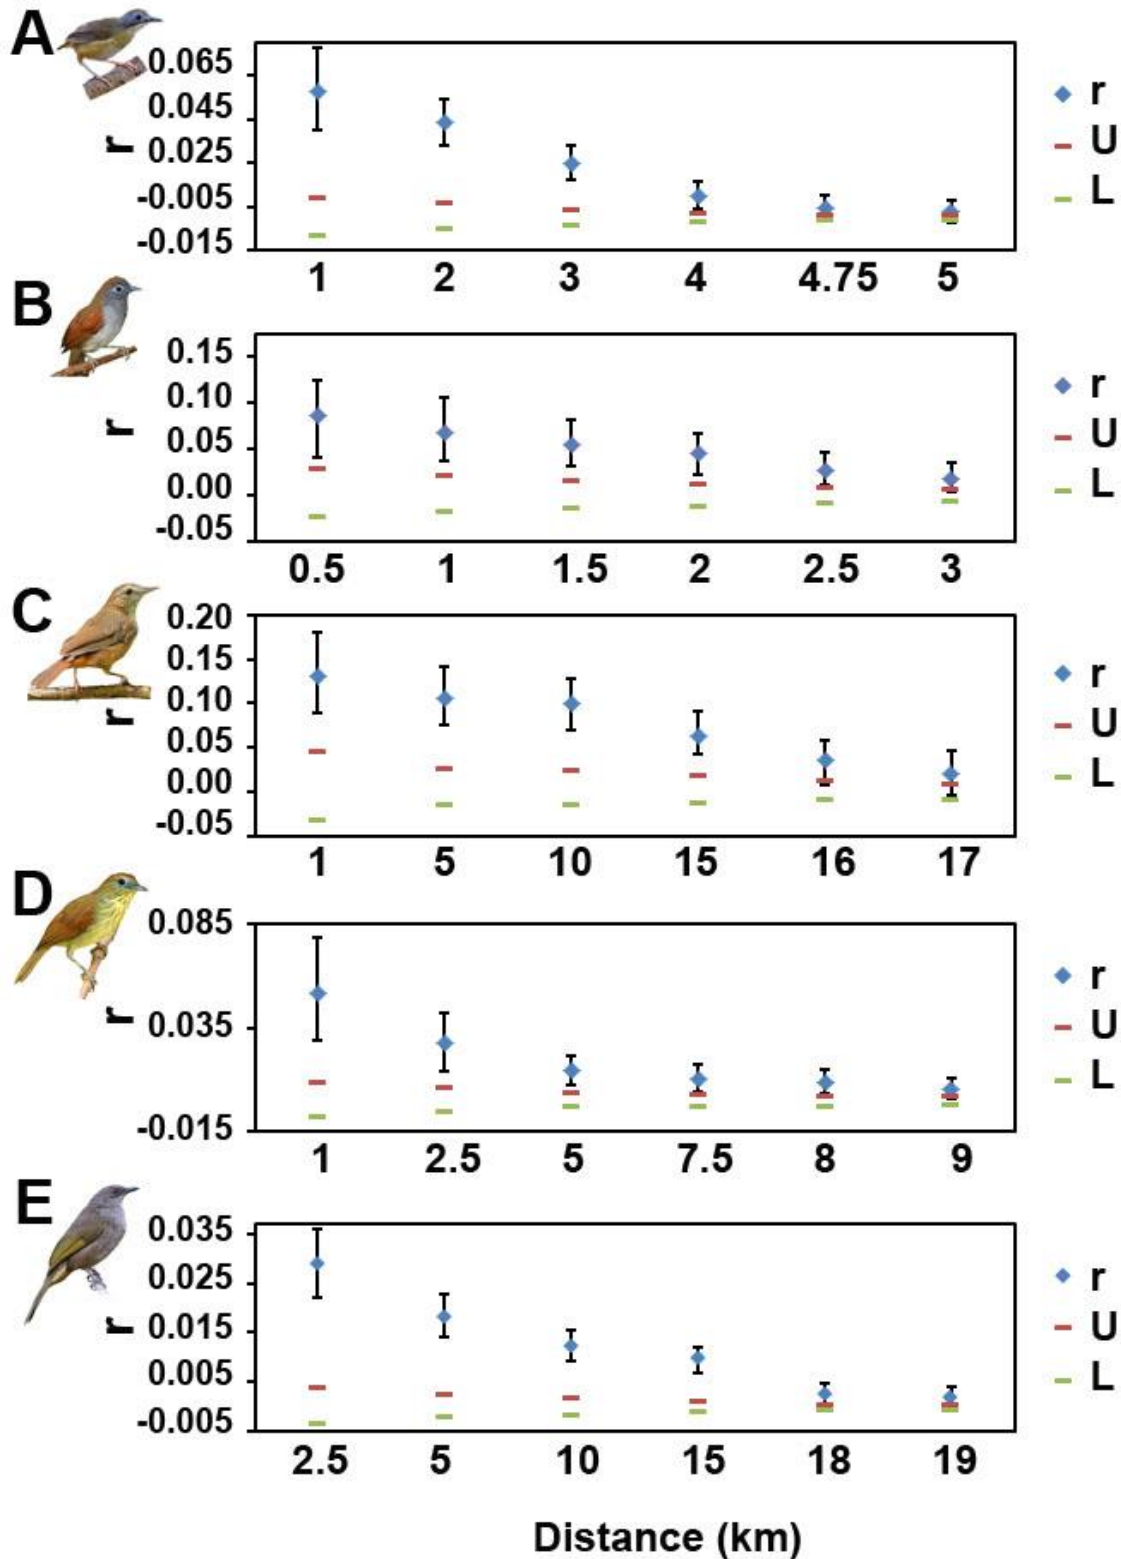

**Fig. S9.** Spatial autocorrelation for (A) *Pellorneum malaccense*, (B) *Cyanoderma erythropterum*, (C) *Turdinus abbotti*, (D) *Mixornis gularis* and (E) *Pycnonotus plumosus*. The graph shows the correlation  $r$  at different distance class sizes with 95% confidence error bars determined by bootstrap resampling, the upper (U), and lower (L) bounds for the 95% confidence interval of the null hypothesis of no spatial structure  $r=0$ . Bird pictures courtesy of Daniel Koh.
